# Supplementary material for: An excellent multifunctional photocatalyst with a polyoxometalate–viologen framework for CEES oxidation, Cr(vi) reduction and dye decolorization under different light regimes
Source: Royal Society of Chemistry journal article supplement (doi:10.1039/d2qi00838f), 2022-01-01
Supplement: d2qi00838f1.pdf [file d2qi00838f1.pdf]

## Electronic Supporting Information

# An excellent multifunctional photocatalyst cooperated by polyoxometalate-viologen framework for CEES oxidation, Cr(VI) reduction and dyes decolorization under different light regimes

Lin Yang, Zhong Zhang,\* Chaonan Zhang, Shuang Li, Guocheng Liu and Xiuli Wang\*

College of Chemistry and Materials Engineering, Professional Technology Innovation Center of Liaoning Province for Conversion Materials of Solar Cell, Bohai University, Jinzhou 121013, China. E-mail: zhangzhong666@126.com (Zhong Zhang), wangxiuli@bhu.edu.cn (Xiuli Wang)

**Table S1** Crystallographic data for **BHU-1**

|                                         |                                                                                  |
|-----------------------------------------|----------------------------------------------------------------------------------|
| Empirical formula                       | C <sub>36</sub> H <sub>38</sub> CoMo <sub>4</sub> N <sub>4</sub> O <sub>22</sub> |
| Formula weight                          | 1321.39                                                                          |
| Crystal system                          | triclinic                                                                        |
| Space group                             | <i>P</i> -1                                                                      |
| a (Å)                                   | 12.6447(13)                                                                      |
| b (Å)                                   | 13.9655(13)                                                                      |
| c (Å)                                   | 14.9485(14)                                                                      |
| α (°)                                   | 63.048(2)                                                                        |
| β (°)                                   | 67.079(2)                                                                        |
| γ (°)                                   | 69.823(2)                                                                        |
| V (Å <sup>3</sup> )                     | 2121.2(4)                                                                        |
| Z                                       | 2                                                                                |
| D <sub>c</sub> (g/cm <sup>3</sup> )     | 1.984                                                                            |
| M (mm <sup>-1</sup> )                   | 1.616                                                                            |
| F(000)                                  | 1246.0                                                                           |
| Reflections collected                   | 12226                                                                            |
| Unique reflections                      | 7502                                                                             |
| R <sub>int</sub>                        | 0.0364                                                                           |
| GOF                                     | 0.971                                                                            |
| R <sub>1</sub> <sup>a</sup> [I>=2σ(I)]  | 0.0424                                                                           |
| wR <sub>2</sub> <sup>b</sup> (all data) | 0.0989                                                                           |

$$^a R_1 = \frac{\sum ||F_o| - |F_c||}{\sum |F_o|}; \quad ^b wR_2 = \frac{\sum [w(F_o^2 - F_c^2)^2]}{\sum [w(F_o^2)^2]}^{1/2}$$

**Table S2** Bond lengths [Å] and angles [°] for **BHU-1**

|                                                                            |            |                     |            |
|----------------------------------------------------------------------------|------------|---------------------|------------|
| Co(1)-O(4)#2                                                               | 2.024(4)   | O(1)-Co(1)-N(1)#3   | 94.83(17)  |
| Co(1)-O(1)                                                                 | 2.100(4)   | O(1)-Co(1)-N(3)#4   | 88.90(18)  |
| Co(1)-O(3)                                                                 | 1.993(4)   | O(3)-Co(1)-O(4)#2   | 122.61(17) |
| Co(1)-O(2)                                                                 | 2.363(4)   | O(3)-Co(1)-O(1)     | 89.74(17)  |
| Co(1)-N(1)#3                                                               | 2.164(5)   | O(3)-Co(1)-O(2)     | 146.56(17) |
| Co(1)-N(3)#4                                                               | 2.203(5)   | O(3)-Co(1)-N(1)#3   | 92.97(17)  |
| O(4)#2-Co(1)-O(1)                                                          | 146.74(16) | O(3)-Co(1)-N(3)#4   | 88.01(17)  |
| O(4)#2-Co(1)-O(2)                                                          | 88.58(16)  | N(1)#3-Co(1)-O(2)   | 98.50(16)  |
| O(4)#2-Co(1)-N(1)#3                                                        | 91.25(17)  | N(1)#3-Co(1)-N(3)#4 | 176.15(19) |
| O(4)#2-Co(1)-N(3)#4                                                        | 85.09(17)  | N(3)#4-Co(1)-O(2)   | 82.64(16)  |
| O(1)-Co(1)-O(2)                                                            | 58.18(15)  |                     |            |
| Symmetry code for <b>BHU-1</b> : #2-X,2-Y,1-Z; #3-1+X,+Y,1+Z; #4+X,+Y,-1+Z |            |                     |            |

**Table S3** Bond Valence Sum (BVS) calculations of all Mo, Ni and selected O atoms in **BHU-1**

| 1-BVS |      |    |      |
|-------|------|----|------|
| Mo1   | 5.96 | O1 | 1.78 |
| Mo2   | 6.03 | O2 | 1.64 |
| Mo3   | 6.02 | O3 | 1.86 |
| Mo4   | 5.85 | O4 | 1.86 |
| Co1   | 1.82 |    |      |

**Table S4** The reported complexes based on POMs and viologen ligands

| Compound                                                                                                                                                                                              | Dimension | Ref |
|-------------------------------------------------------------------------------------------------------------------------------------------------------------------------------------------------------|-----------|-----|
| Co <sub>2</sub> (bpdo) <sub>4</sub> (H <sub>2</sub> O) <sub>6</sub> [(α-GeW <sub>12</sub> O <sub>40</sub> )]·4H <sub>2</sub> O                                                                        | 1D        | [1] |
| [Co <sub>5</sub> (bpdo) <sub>5</sub> (H <sub>2</sub> O) <sub>18</sub> ][Co <sub>4</sub> (H <sub>2</sub> O) <sub>2</sub> (B-α-PW <sub>9</sub> O <sub>34</sub> ) <sub>2</sub> ]·bpdo·10H <sub>2</sub> O | 2D        |     |
| [Cu <sub>2</sub> (CPBPY) <sub>4</sub> (H <sub>2</sub> O) <sub>2</sub> ][PW <sub>12</sub> O <sub>40</sub> ][OH]·6H <sub>2</sub> O                                                                      | 2D        | [2] |
| [Cu <sub>2</sub> (H <sub>2</sub> O) <sub>3</sub> (CPBPY) <sub>2</sub> (CuHPW <sub>11</sub> O <sub>39</sub> )]·7H <sub>2</sub> O                                                                       | 1D        | [3] |
| (Bpyen) <sub>2</sub> (Mo <sub>8</sub> O <sub>26</sub> )·2H <sub>2</sub> O                                                                                                                             | 0D        | [4] |
| [(Pbpy) <sub>2</sub> (Mo <sub>8</sub> O <sub>26</sub> )]·4H <sub>2</sub> O                                                                                                                            |           |     |
| [Ag <sup>I</sup> (bmypd) <sub>0.5</sub> (β-Mo <sub>8</sub> O <sub>26</sub> ) <sub>0.5</sub> ]                                                                                                         | 2D        | [5] |
| [Ag <sup>I</sup> <sub>2</sub> (bypy) <sub>4</sub> (HSiW <sub>12</sub> O <sub>40</sub> ) <sub>2</sub> ]·14H <sub>2</sub> O                                                                             | 0D        |     |
| [Ag <sup>I</sup> (bypy)(γ-Mo <sub>8</sub> O <sub>26</sub> ) <sub>0.5</sub> ]                                                                                                                          | 2D        |     |
| [Cu(PBPY) <sub>2</sub> ][SiW <sub>12</sub> O <sub>40</sub> ]                                                                                                                                          | 1D        | [6] |
| (Me <sub>2</sub> NH <sub>2</sub> ) <sub>3</sub> [PW <sub>11</sub> ZnO <sub>40</sub> ]                                                                                                                 | 0D        | [7] |
| [δ-Mo <sub>8</sub> O <sub>26</sub> ](L) <sub>2</sub> ·2H <sub>2</sub> O                                                                                                                               | 0D        | [8] |
| [(AV <sup>2+</sup> )(p-AV)(EuW <sub>10</sub> O <sub>36</sub> )] <sub>n</sub> ·2nH <sub>2</sub> O                                                                                                      | 1D        | [9] |
| (AV <sup>2+</sup> )[H <sub>2</sub> W <sub>12</sub> O <sub>40</sub> ]·5H <sub>2</sub> O                                                                                                                | 0D        |     |

|                                                                     |    |      |
|---------------------------------------------------------------------|----|------|
| $(C_{14}H_{11}N_{40})_2[Mo_8O_{26}]$                                | 0D | [10] |
| $\{[Co_2(bpdo)_4(H_2O)_6](\alpha-GeW_{12}O_{40})\} \cdot 4(H_2O)_n$ | 1D | [11] |

**Table S5** Conversion and selectivity of the oxidation of CEES to CEESO in every 1 min and under different solvents

| Entry | H <sub>2</sub> O <sub>2</sub><br>(mmol) | Catal.<br>( $\mu$ mol) | Solvent                          | Light   | Time<br>(min) | Conv.<br>(%) | Sele.<br>(%) |
|-------|-----------------------------------------|------------------------|----------------------------------|---------|---------------|--------------|--------------|
| 1     | 0.5                                     | 4                      | C <sub>2</sub> H <sub>5</sub> OH | Visible | 5             | 98           | 97           |
| 2     | 0.5                                     | 4                      | CH <sub>3</sub> CN               | Visible | 5             | 10           | 67           |
| 3     | 0.5                                     | 4                      | CH <sub>2</sub> Cl <sub>2</sub>  | Visible | 5             | 9            | 14           |
| 4     | 0.5                                     | 4                      | C <sub>2</sub> H <sub>5</sub> OH | Visible | 1             | 38           | 86           |
| 5     | 0.5                                     | 4                      | C <sub>2</sub> H <sub>5</sub> OH | Visible | 2             | 67           | 92           |
| 6     | 0.5                                     | 4                      | C <sub>2</sub> H <sub>5</sub> OH | Visible | 3             | 84           | 94           |
| 7     | 0.5                                     | 4                      | C <sub>2</sub> H <sub>5</sub> OH | Visible | 4             | 92           | 95           |
| 8     | 0.5                                     | 4                      | C <sub>2</sub> H <sub>5</sub> OH | Visible | 5             | 98           | 97           |

**Table S6** The concentration of Co ions in the solution after the photocatalytic reaction

| Cycles | Co ions concentration (ppm) |
|--------|-----------------------------|
| 1      | 0.223                       |
| 2      | 0.275                       |
| 3      | 0.237                       |

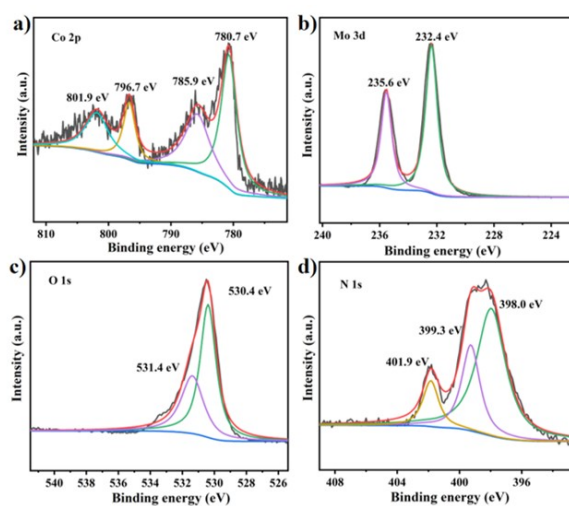

**Fig. S1** The XPS spectra of 1: a) Co 2p, b) Mo 3d, c) O 1s and d) N 1s.

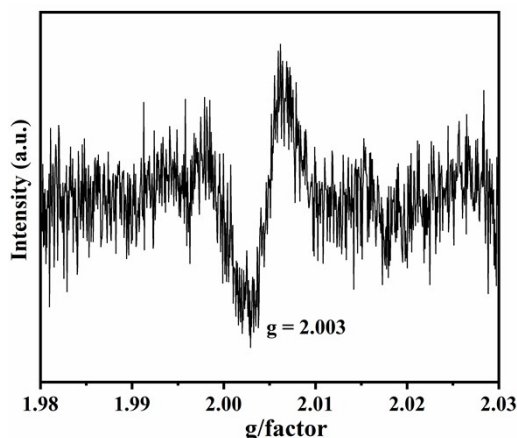

**Fig. S2** The EPR spectrum of **BHU-1**.

The high resolution XPS spectra for Co 2p appear at 780.7 and 796.7 eV corresponding to Co 2p<sub>3/2</sub> and Co 2p<sub>1/2</sub> and obvious shake-up satellite features for Co 2p<sub>3/2</sub> and Co 2p<sub>1/2</sub> were also observed at 785.9 and 801.9 eV, respectively [12, 13]. The peaks of Mo 3d at 235.6 eV and 232.4 eV are assigned to Mo 3d<sub>5/2</sub> and 3d<sub>3/2</sub> orbitals of Mo<sup>6+</sup> [14]. The O 1s state always contains low binding energy peak (LP) and high binding energy peak (HP) centred nearly at 530.4 and 531.4 eV [15]. The XPS N 1s spectra can be divided into 398.0 eV, 399.3 eV, which may be related to the N of pyridine and quaternary ammonium salt, the extra small peak at 401.9 eV corresponds to the nitrogen atom of the pyridyl radical with the EPR spectrum has a typical weak signal for the bipyridinium radical [16-19].

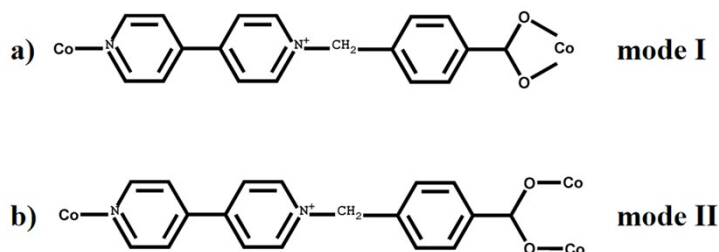

**Fig. S3** Two types of coordination modes of bcbpy ligand: a) mode I, b) mode II.

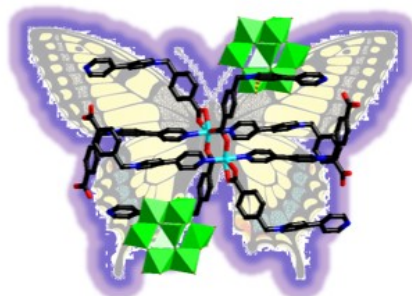

**Fig. S4** The hydrogen-bond [C5-H5...O11: 2.982(10) Å] interaction between [0-Mo<sub>8</sub>O<sub>26</sub>]<sup>4-</sup> clusters and [Co<sub>2</sub>(bcbpy)<sub>8</sub>]<sup>4+</sup>.

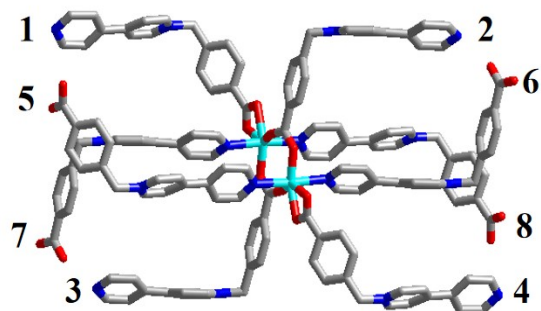

Fig. S5 Branches 1-8 in  $[\text{Co}_2(\text{bcbpy})_8]^{4+}$ .

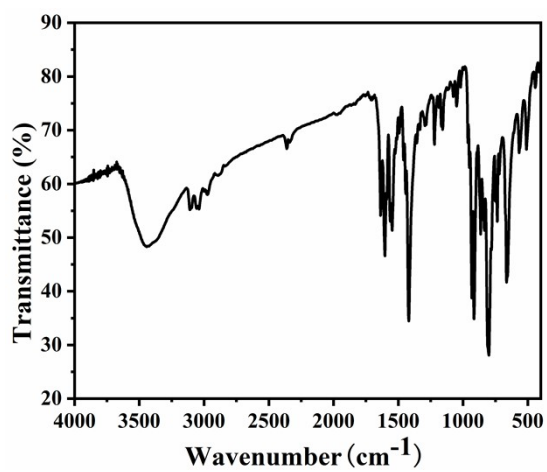

Fig. S6 IR spectrum of BHU-1.

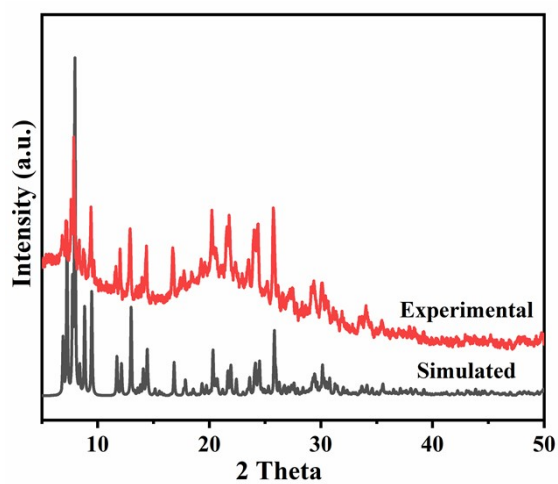

Fig. S7 Comparison of the experimental and simulated PXRD patterns of BHU-1.

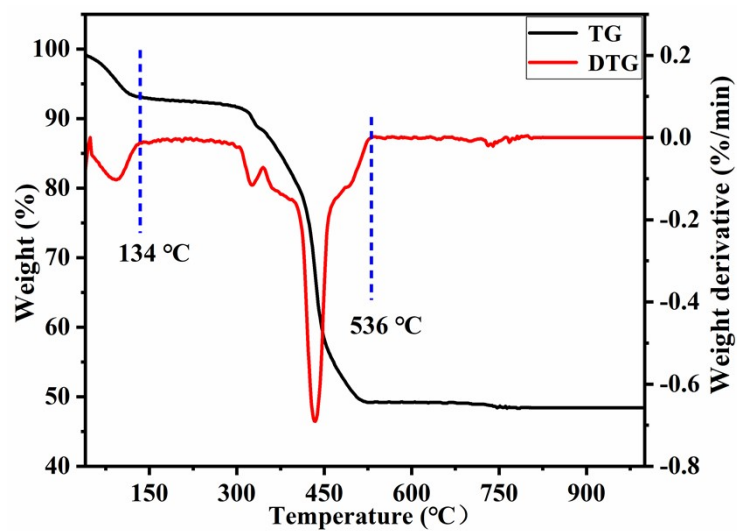

Fig. S8 TG and DTG curves of BHU-1.

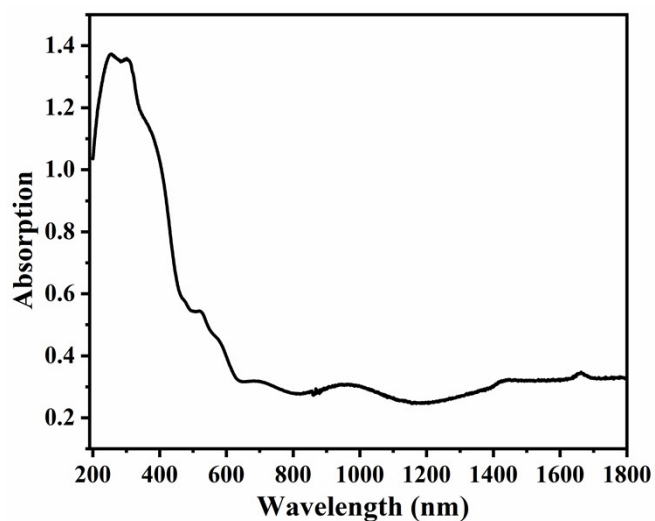

Fig. S9 UV-Vis-NIR absorption spectrum of BHU-1.

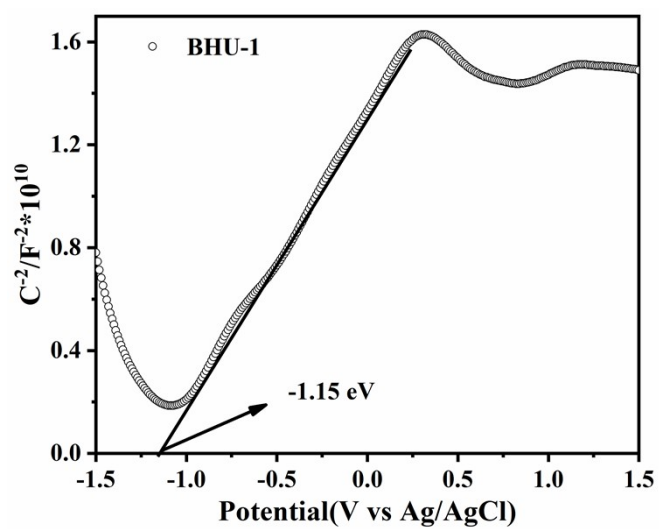

Fig. S10 Mott-Schottky plot of BHU-1.

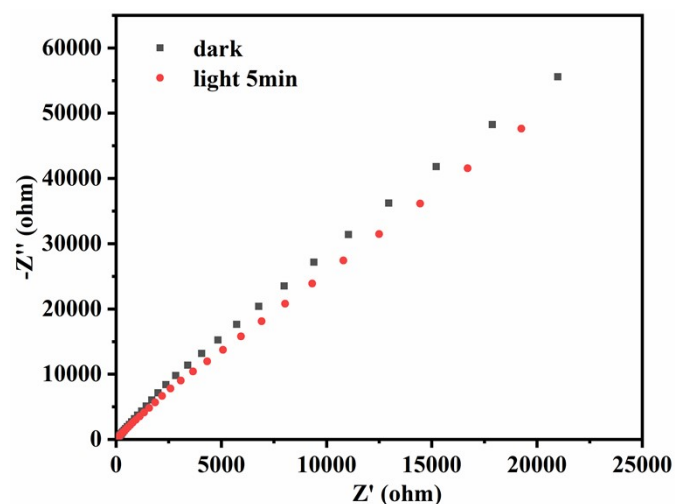

Fig. S11 EIS Nyquist plots of the **BHU-1** in 0.5 mol/L  $\text{Na}_2\text{SO}_4$  solution under visible light irradiation.

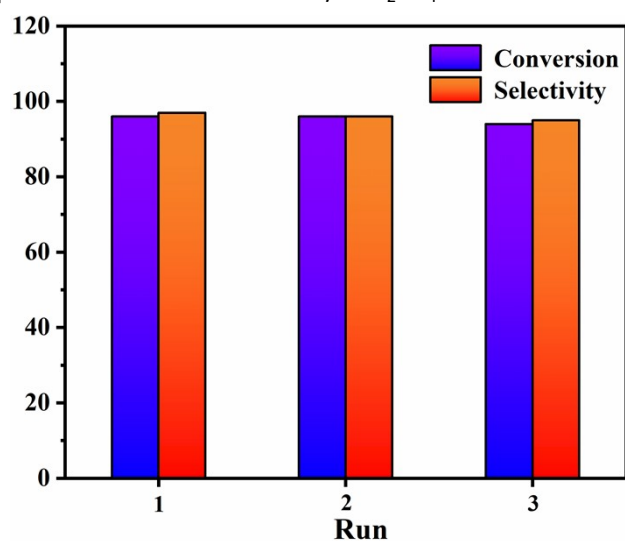

Fig. S12 The conversion and selectivity of CEES to CEESO after 3 cycles.

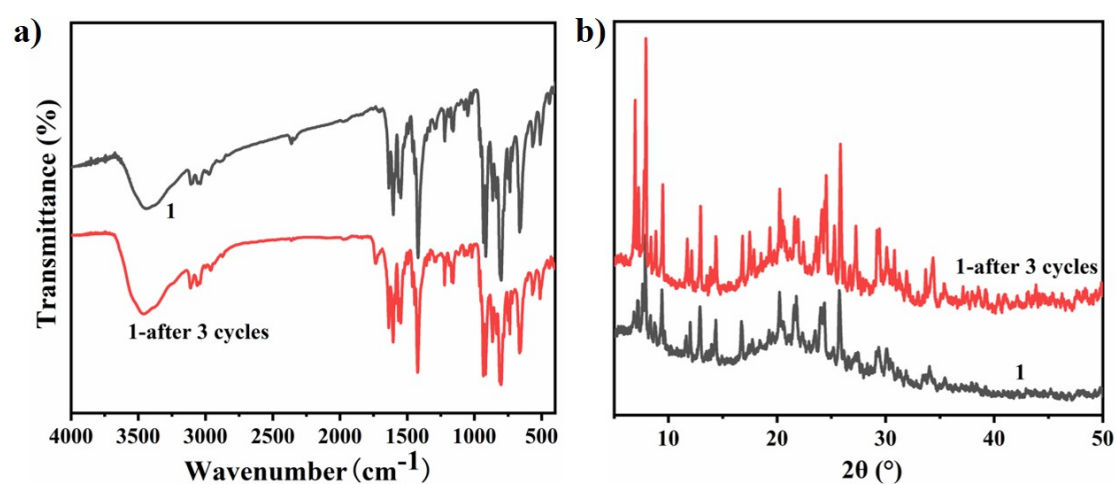

Fig. S13 The a) IR and b) PXRD spectra of **BHU-1** before and after 3 cycles for the oxidation of CEES.

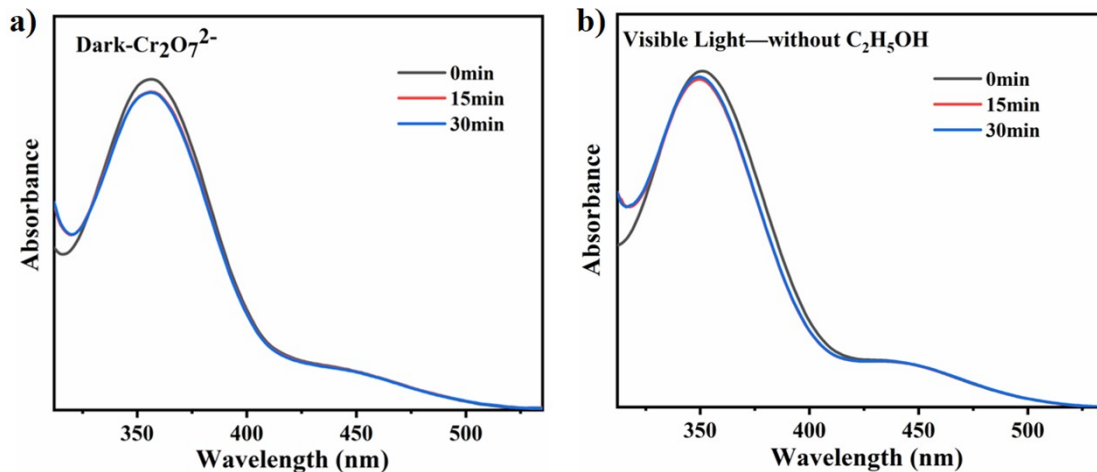

Fig. S14 Absorption spectra of the reduction of  $\text{Cr}_2\text{O}_7^{2-}$  a) in the dark and b) without  $\text{C}_2\text{H}_5\text{OH}$ .

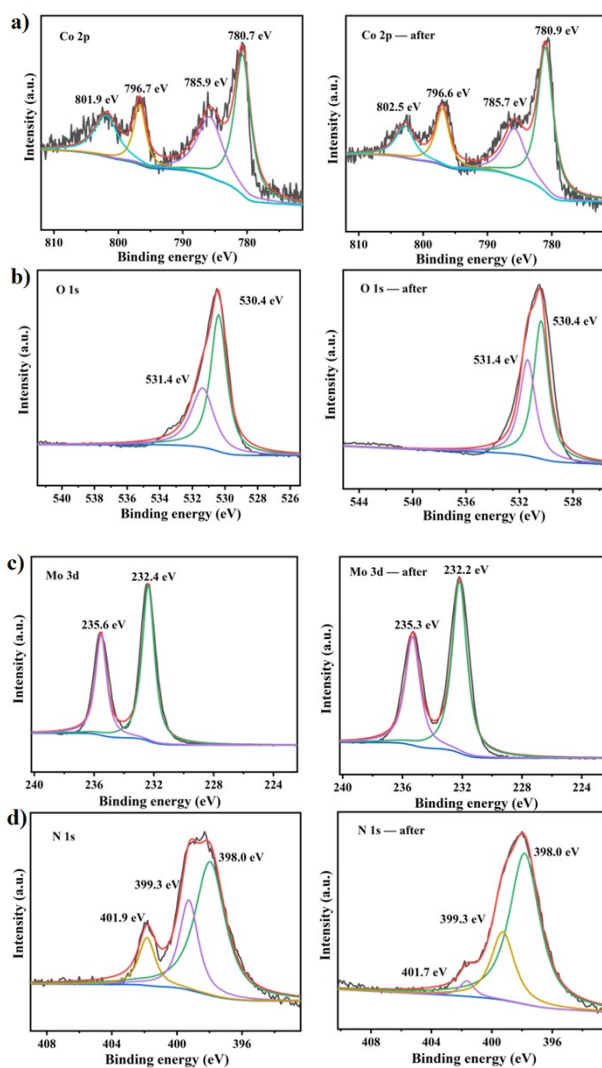

Fig. S15 The a) Co, b) O, c) Mo, d) N XPS spectra of BHU-1 before and after photoreduction.



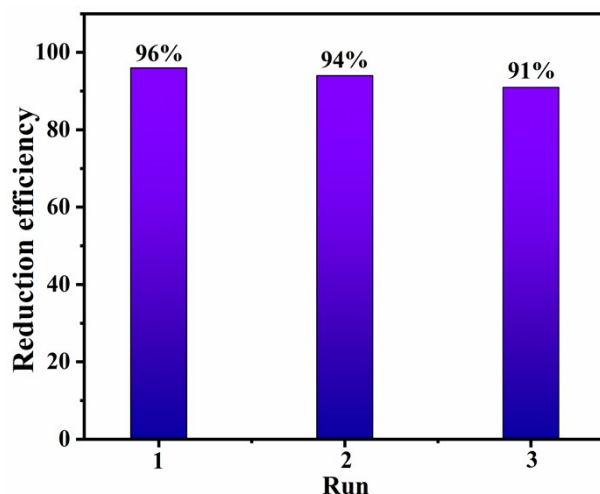

**Fig. S16** The decolorization rate of RhB under visible light irradiation after 3 cycles.

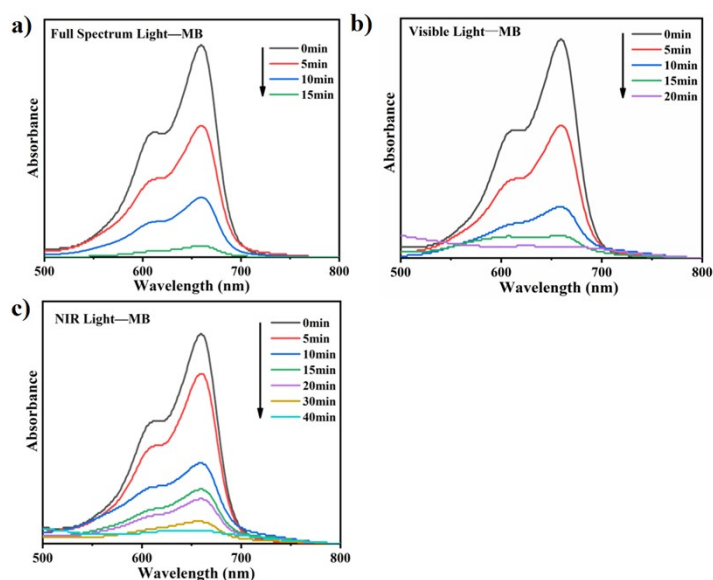

**Fig. S17** a-c) Absorption spectra of the MB solution in the presence of **BHU-1** under full spectrum, visible, and NIR light irradiation, respectively.

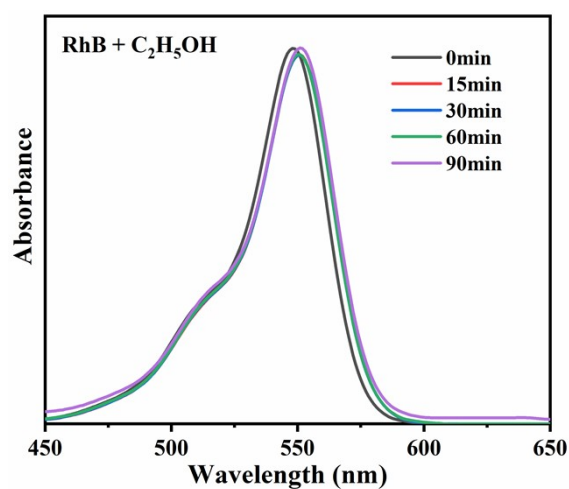

**Fig. S18** Absorption spectra of the RhB solution in the presence of C<sub>2</sub>H<sub>5</sub>OH under the visible light irradiation.

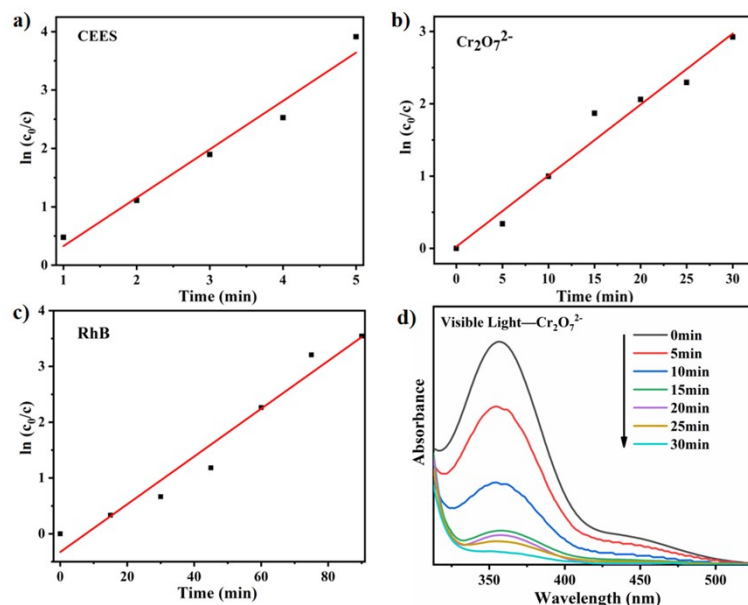

**Fig. S19** a-c) The linear plot of  $\ln(c_0/c)$  vs. reaction time (t) of CEES, Cr(VI) and RhB. d) Absorption spectra of the reduction of  $\text{Cr}_2\text{O}_7^{2-}$  under visible light irradiation every 5 min.

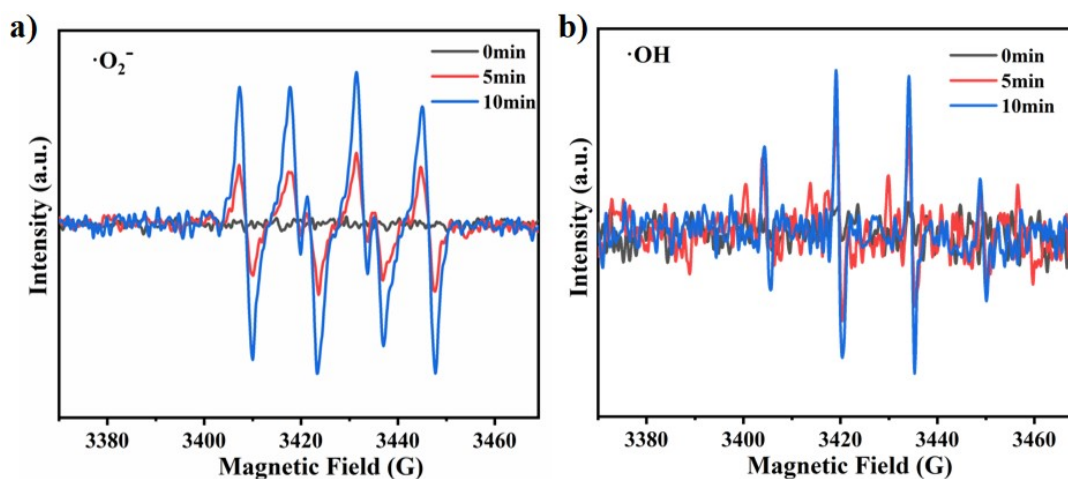

**Fig. S20** EPR spectra of DMPO-adducts: a)  $\cdot\text{O}_2^-$  and b)  $\cdot\text{OH}$  for BHU-1.

## References

- [1] Y. R. Huang, X. L. Lin, B. Chen, H. D. Zheng, Z. R. Chen, H. H. Li and S. T. Zheng, Thermal-responsive polyoxometalate-metalloviologen hybrid: reversible intermolecular three-Component reaction and temperature-regulated resistive switching behaviors, *Angew. Chem. Int. Ed.*, 2021, **60**, 16911-16916.
- [2] X. J. Sun, J. Zhang and Z. Y. Fu, Polyoxometalate cluster sensitized with copper-viologen framework for efficient degradation of organic dye in ultraviolet, visible, and near-infrared light, *ACS Appl. Mater. Interfaces*, 2018, **10**, 35671-35675.
- [3] X. J. Sun, J. Zhang, A. D. Tan and Z. Y. Fu, A highly efficient near-infrared-activated photocatalyst based on an electron-deficient copper-viologen-polyoxometalate framework with a copper {Cu<sub>3</sub>} cluster decorated phosphotungstate as a building block, *Cryst. Grow. Des.*, 2019,

19, 6845-6849.

[4] L. Li, J. R. Wang, Y. Hua, Y. Guo, C. Fu, Y. N. Sun and H. Zhang, "Reversible" photochromism of polyoxomolybdate–viologen hybrids without the need for proton transfer, *J. Mater. Chem. C*, 2019, **7**, 38-42.

[5] J. Ying, L. Jin, C. X. Sun, A. X. Tian and X. L. Wang, A series of polyoxometalate-viologen photochromic materials for UV probing, amine detecting and inkless and erasable printing, *Chem. Eur. J.*, 2022, **28**, e202103268.

[6] X. J. Sun, J. Zhang, X. Z. Yuan and Z. Y. Fu, A silicotungstate-based copper–viologen hybrid photocatalytic compound for efficient degradation of organic dyes under visible light, *CrystEngComm*, 2019, **21**, 5563-5567.

[7] L. Li, Y. C. Zou, Y. Hua, X. N. Li, Z. H. Wang and H. Zhang, Polyoxometalate-viologen photochromic hybrids for rapid solar ultraviolet light detection, photoluminescence-based UV probing and inkless and erasable printing, *Dalton Trans*, 2020, **49**, 89-94.

[8] X. X. Song, H. F. Fu, P. Wang, H. Y. Li, Y. Q. Zhang and C. C. Wang, The selectively fluorescent sensing detection and adsorptive removal of Pb<sup>2+</sup> with a stable [ $\delta$ -Mo<sub>8</sub>O<sub>26</sub>]-based hybrid, *J. Colloid Interface Sci.*, 2018, **532**, 598-604.

[9] D. F. Shen, S. Li, H. Liu, W. Jiang, Q. Zhang and G. G. Gao, A durable and fast-responsive photochromic and switchable luminescent polyviologen–polyoxometalate hybrid, *J. Mater. Chem. C*, 2015, **3**, 12090-12097.

[10] L. Li, Y. Hua, Y. Guo, G. S. Zhang, X. N. Li and H. Zhang, Viologen as a colour modulator in photochromism of polyoxomolybdate–viologen hybrids, *Eur. J. Inorg. Chem.*, 2018, **33**, 3757-3760.

[11] B. Chen, Y. R. Huang, K. Y. Song, X. L. Lin, H. H. Li and Z. R. Chen, Molecular nonvolatile memory based on [ $\alpha$ -GeW<sub>12</sub>O<sub>40</sub>]<sup>4-</sup>/metalloviologen hybrids can work at high temperature monitored by chromism, *Chem. Mater.*, 2021, **33**, 2178-2186.

[12] E. B. Castro, C. A. Gervasi, Electrodeposited Ni-Co-oxide electrodes: characterization and kinetics of the oxygen evolution reaction, *Int. J. Hydrogen Energy*, 2000, **25**, 1163-1170.

[13] H. M. Liu, G. L. Wei, Z. Xu, P. Liu and Y. Li, Quantitative analysis of Fe and Co in Co-substituted magnetite using XPS: The application of non-linear least squares fitting (NLLSF), *Appl. Surf. Sci.*, 2016, **389**, 438-446.

[14] X. X. Song, H. F. Fu, P. Wang, H. Y. Li, Y. Q. Zhang and C. C. Wang, The selectively fluorescent sensing detection and adsorptive removal of Pb<sup>2+</sup> with a stable [ $\delta$ -Mo<sub>8</sub>O<sub>26</sub>]-based hybrid, *J. Colloid Interface Sci.*, 2018, **532**, 598–604.

[15] R. Li, L. y. Liu, B. M. Ming, Y. H. Ji and R. Z. Wang, Oxygen vacancy effect on photoluminescence of KNb<sub>3</sub>O<sub>8</sub> nanosheets, *Appl. Surf. Sci.*, 2018, **439**, 983-990.

[16] Z. Ren, Y. Liu, Y. Lyu, X. G. Song, C. Y. Zheng, S. Q. Feng, Z. Jiang and Y. J. Ding, Single-atom Rh based bipyridine framework porous organic polymer: A high active and superb stable catalyst for heterogeneous methanol carbonylation, *J. Catal.*, 2019, **369**, 249-256.

[17] J. Y. Jung, Y. L. Hong, J. G. Kim, M. J. Kim, Y. K. Kim and N. D. Kim, New insight of tailor-made graphene oxide for the formation of atomic Co-N sites toward hydrogen evolution reaction, *Appl. Surf. Sci.*, 2021, **563**, 150254.

[18] Y. X. Cui, L. Y. Yin, X. Y. Sun, N. Zhang, N. Gao and G. S. Zhu, A universal and reversible wet adhesive via straightforward aqueous self-assembly of polyethylenimine and polyoxometalate, *ACS Appl. Mater. Interfaces*, 2021, **13**, 47155–47162.

[19] X. D. Yang, L. Sun, C. Chen, Y. J. Zhang and J. Zhang, Anion-controlled photochromism of two bipyridinium-based coordination polymers and nondestructive luminescence readout, *Dalton Trans.*, 2017, **46**, 4366-4372.
